# Supplementary material for: Identification of Potential SARS-CoV-2 Main Protease and Spike Protein Inhibitors from the Genus Aloe: An In Silico Study for Drug Development
Source: MDPI journal article supplement (doi:10.3390/molecules26061767), 2021-03-21
Supplement: s1 [file s1]

## Supplementary

### Article

# Identification of Potential SARS-CoV-2 Main Protease and Spike Protein Inhibitors from the Genus *Aloe*: An *In silico* Study for Drug Development

Mohamed E. Abouelela <sup>1</sup>, Hamdy K. Assaf <sup>1</sup>, Reda A. Abdelhamid <sup>1</sup>, Ehab S. Elkhyat <sup>1</sup>, Ahmed M. Sayed <sup>2</sup>, Tomasz Oszako <sup>3</sup>, Lassaad Belbahri <sup>4,\*</sup>, Ahmed E. El Zowalaty <sup>5,6,\*</sup> and Mohamed Salaheldin. A. Abdelkader <sup>7,\*</sup>

- <sup>1</sup> Department of Pharmacognosy, Faculty of Pharmacy, Al-Azhar University, Assiut-Branch, Assiut 71524, Egypt; m\_abouelela@azhar.edu.eg (M.E.A.); hamdyss200@azhar.edu.eg (H.K.A.); reda.ahmed@azhar.edu.eg (R.A.A.); elkhyat@azhar.edu.eg (E.S.E.)
  - <sup>2</sup> Department of Pharmacognosy, Faculty of Pharmacy, Nahda University, Beni-Suef 62513, Egypt; Ahmed.mohamed.sayed@nub.edu.eg
  - <sup>3</sup> Department of Forest Protection, Forest Research Institute, 05-090 Sekocin Stary, Poland; T.Oszako@ibles.waw.pl
  - <sup>4</sup> Laboratory of Soil Biology, University of Neuchatel, 2000 Neuchatel, Switzerland
  - <sup>5</sup> Sahlgrenska Center for Cancer Research, Department of Surgery, Institute of Clinical Sciences, University of Gothenburg, 405 30 Gothenburg, Sweden
  - <sup>6</sup> Wallenberg Centre for Molecular and Translational Medicine, University of Gothenburg, 405 30 Gothenburg, Sweden
  - <sup>7</sup> Department of Pharmacognosy, Faculty of Pharmacy, Sohag University, Nasr City, 82524, Sohag, Egypt
- \* Correspondence: lassaad.belbahri@unine.ch (L.B.); ahmed.el.zowalaty@gu.se (A.E.E.Z.); m.salaheldin@pharm.sohag.edu.eg (M.S.A.A.)

**Citation:** Abouelela M. E., Assaf H. K., Abdelhamid R. A., Elkhyat E. S., Sayed A. M., Oszako T., Belbahri L., El Zowalaty A. E. and Abdelkader M. S. Identification of Potential SARS-CoV-2 Main Protease and Spike Protein Inhibitors from *Aloe* genus: *In silico* study for drug development. *Molecules* **2021**, *26*, 1767. <https://doi.org/10.3390/10.3390/molecules26061767>

Academic Editors: Shugeng Cao, Mostafa Rateb and Jianguang Luo  
Received: 24 February 2021  
Accepted: 18 March 2021  
Published: 21 March 2021

**Publisher's Note:** MDPI stays neutral with regard to jurisdictional claims in published maps and institutional affiliations.

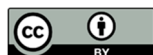

**Copyright:** © 2021 by the authors. Licensee MDPI, Basel, Switzerland. This article is an open access article distributed under the terms and conditions of the Creative Commons Attribution (CC BY) license (<http://creativecommons.org/licenses/by/4.0/>).

| Page | Contents                                                              |
|------|-----------------------------------------------------------------------|
| 3    | <b>Figure S1:</b> Compounds isolated from genus Aloe (1-17)           |
| 4    | <b>Figure S2:</b> Compounds isolated from genus Aloe (18-31)          |
| 5    | <b>Figure S3:</b> Compounds isolated from genus Aloe (32-47)          |
| 6    | <b>Figure S4:</b> Compounds isolated from genus Aloe (48-60)          |
| 7    | <b>Figure S5:</b> Compounds isolated from genus Aloe (61-75)          |
| 8    | <b>Figure S6:</b> Compounds isolated from genus Aloe (76-92)          |
| 9    | <b>Figure S7:</b> Compounds isolated from genus Aloe (93-107)         |
| 10   | <b>Figure S8:</b> Compounds isolated from genus Aloe (108-118)        |
| 11   | <b>Figure S9:</b> Compounds isolated from genus Aloe (119-127)        |
| 12   | <b>Figure S10:</b> Compounds isolated from genus Aloe (128-136)       |
| 13   | <b>Figure S11:</b> Compounds isolated from genus Aloe (137-144)       |
| 14   | <b>Figure S12:</b> Compounds isolated from genus Aloe (145-153)       |
| 15   | <b>Figure S13:</b> Compounds isolated from genus Aloe (154-168)       |
| 16   | <b>Figure S14:</b> Compounds isolated from genus Aloe (169-182)       |
| 17   | <b>Figure S15:</b> Compounds isolated from genus Aloe (183-194)       |
| 18   | <b>Figure S16:</b> Compounds isolated from genus Aloe (195-211)       |
| 19   | <b>Figure S17:</b> Compounds isolated from genus Aloe (212-231)       |
| 20   | <b>Figure S18:</b> Compounds isolated from genus Aloe (232-237)       |
| 21   | <b>Table S1.</b> Predicted pharmacokinetics of top scoring compounds. |

|           | 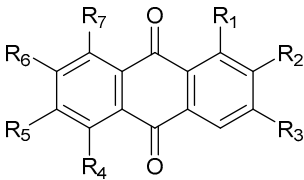 |                      |                      |                      |                             |                      |                      |
|-----------|-----------------------------------------------------------------------------------|----------------------|----------------------|----------------------|-----------------------------|----------------------|----------------------|
|           | <b>R<sub>1</sub></b>                                                              | <b>R<sub>2</sub></b> | <b>R<sub>3</sub></b> | <b>R<sub>4</sub></b> | <b>R<sub>5</sub></b>        | <b>R<sub>6</sub></b> | <b>R<sub>7</sub></b> |
| <b>1</b>  | OH                                                                                | H                    | CH <sub>3</sub>      | H                    | H                           | H                    | OH                   |
| <b>2</b>  | OH                                                                                | H                    | CH <sub>3</sub>      | OH                   | H                           | H                    | OCH <sub>3</sub>     |
| <b>3</b>  | OH                                                                                | H                    | CH <sub>2</sub> (OH) | H                    | H                           | H                    | OH                   |
| <b>4</b>  | OH                                                                                | H                    | CH <sub>2</sub> (OH) | H                    | H                           | OH                   | OH                   |
| <b>5</b>  | OH                                                                                | H                    | CH <sub>3</sub>      | H                    | H                           | OH                   | OH                   |
| <b>6</b>  | OH                                                                                | H                    | CH <sub>3</sub>      | H                    | H                           | OH                   | OCH <sub>3</sub>     |
| <b>7</b>  | OH                                                                                | H                    | CH <sub>3</sub>      | H                    | OH                          | H                    | OH                   |
| <b>8</b>  | CH <sub>3</sub>                                                                   | H                    | OH                   | H                    | H                           | H                    | OH                   |
| <b>9</b>  | CH <sub>3</sub>                                                                   | COOCH <sub>3</sub>   | OH                   | H                    | H                           | H                    | OH                   |
| <b>10</b> | CH <sub>3</sub>                                                                   | COOCH <sub>3</sub>   | OH                   | H                    | H                           | H                    | OCH <sub>3</sub>     |
| <b>11</b> | OH                                                                                | H                    | CH <sub>3</sub>      | OH                   | H                           | H                    | OH                   |
| <b>12</b> | OH                                                                                | H                    | CH <sub>3</sub>      | OCH <sub>3</sub>     | H                           | H                    | H                    |
| <b>13</b> | OH                                                                                | H                    | CH <sub>3</sub>      | OH                   | H                           | OCH <sub>3</sub>     | OH                   |
| <b>14</b> | CH <sub>3</sub>                                                                   | H                    | OH                   | H                    | OH                          | H                    | OH                   |
| <b>15</b> | CH <sub>3</sub>                                                                   | COOCH <sub>3</sub>   | OH                   | H                    | OH                          | H                    | OH                   |
| <b>16</b> | OH                                                                                | H                    | CH <sub>3</sub>      | H                    | <i>O</i> -Prenyl            | H                    | OH                   |
| <b>17</b> | OH                                                                                | H                    | CH <sub>3</sub>      | H                    | <i>O</i> -Prenyl-<br>Prenyl | H                    | OH                   |

**Figure S1.** Compounds isolated from genus Aloe (**1-17**).

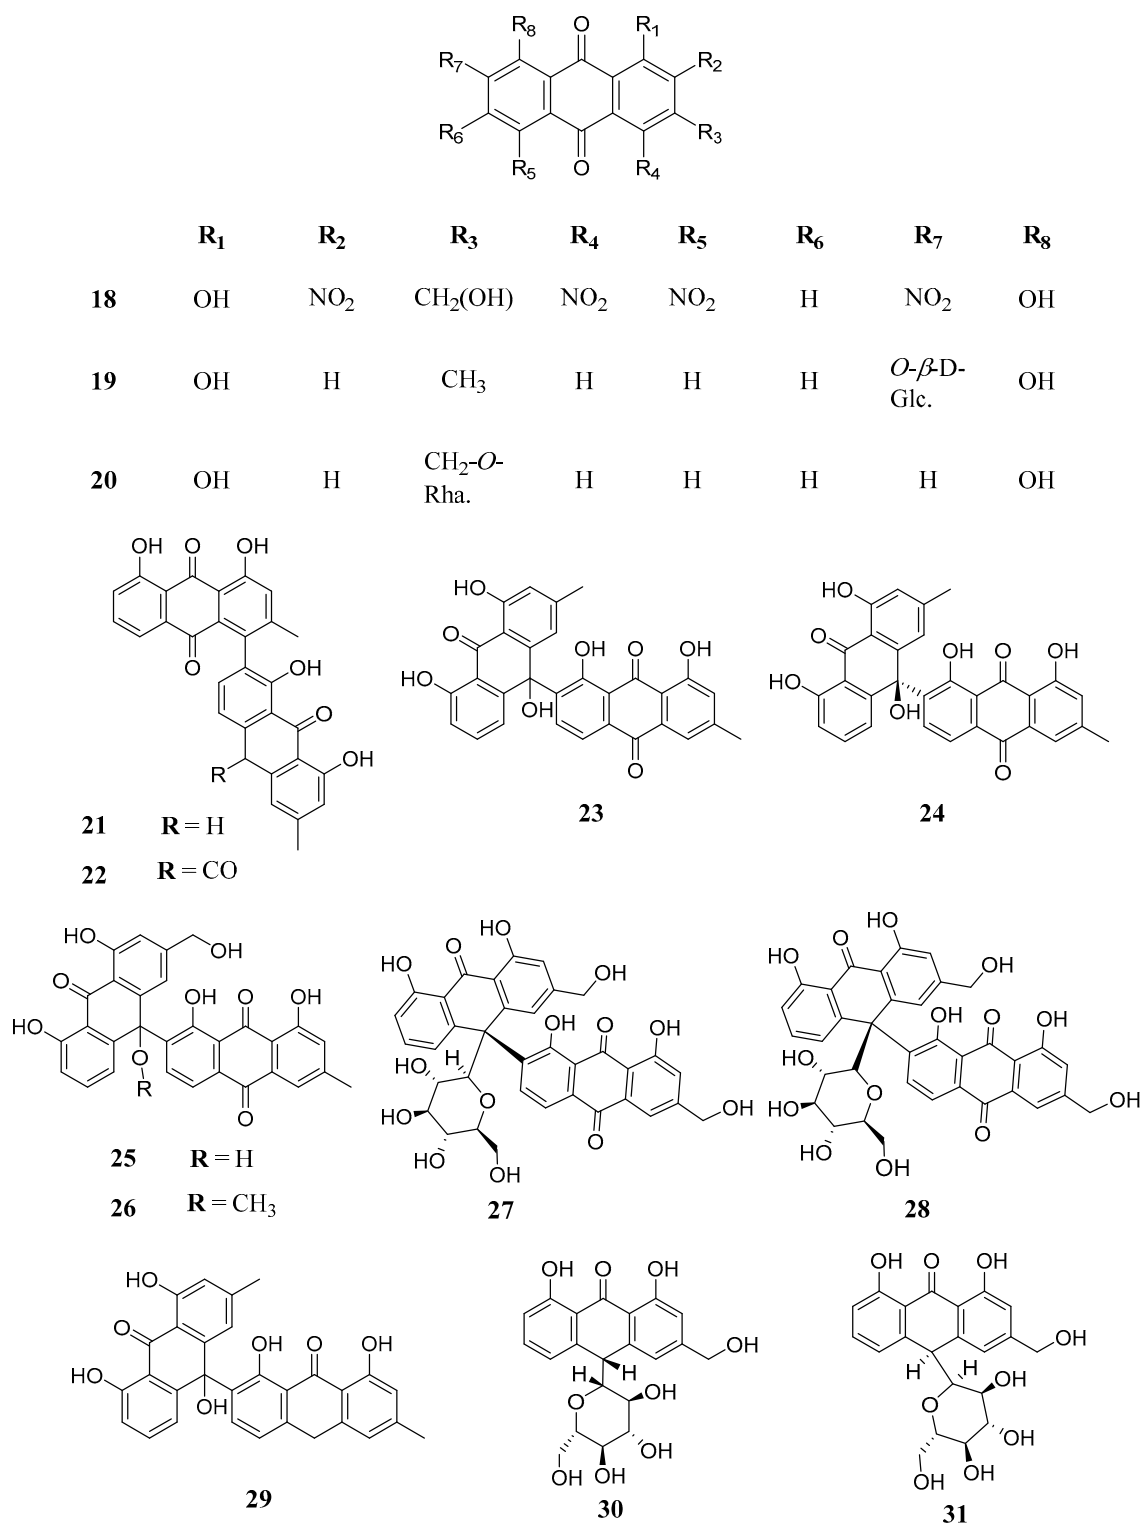

**Figure S2:** Compounds isolated from genus *Aloe* (18-31)

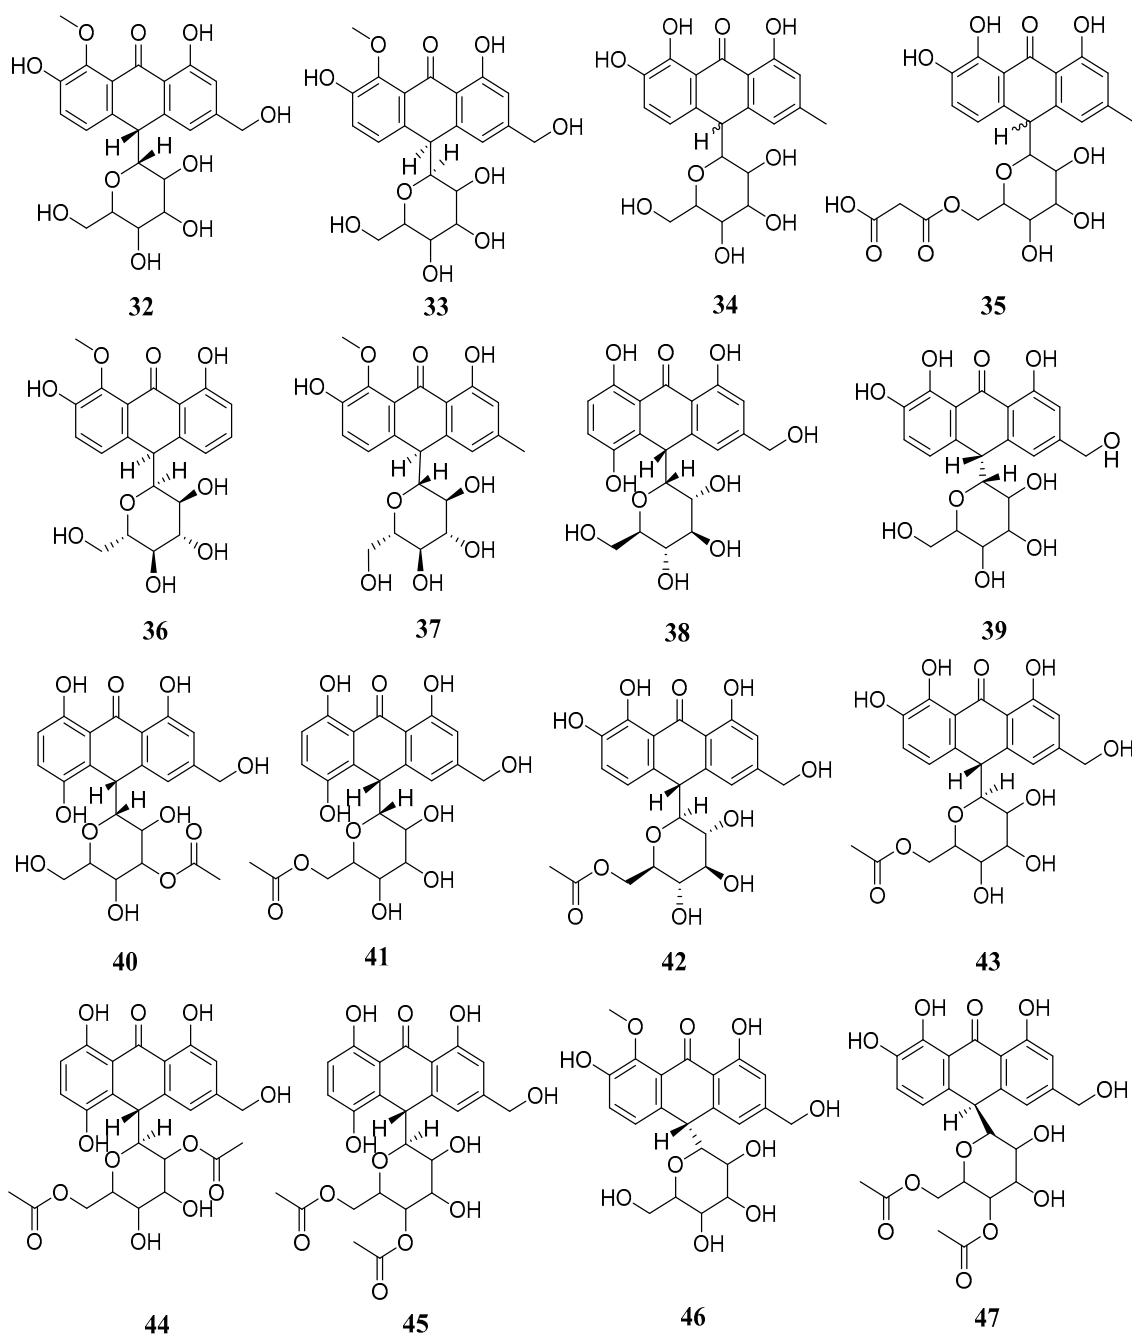

**Figure S3:** Compounds isolated from genus Aloe (32-47)

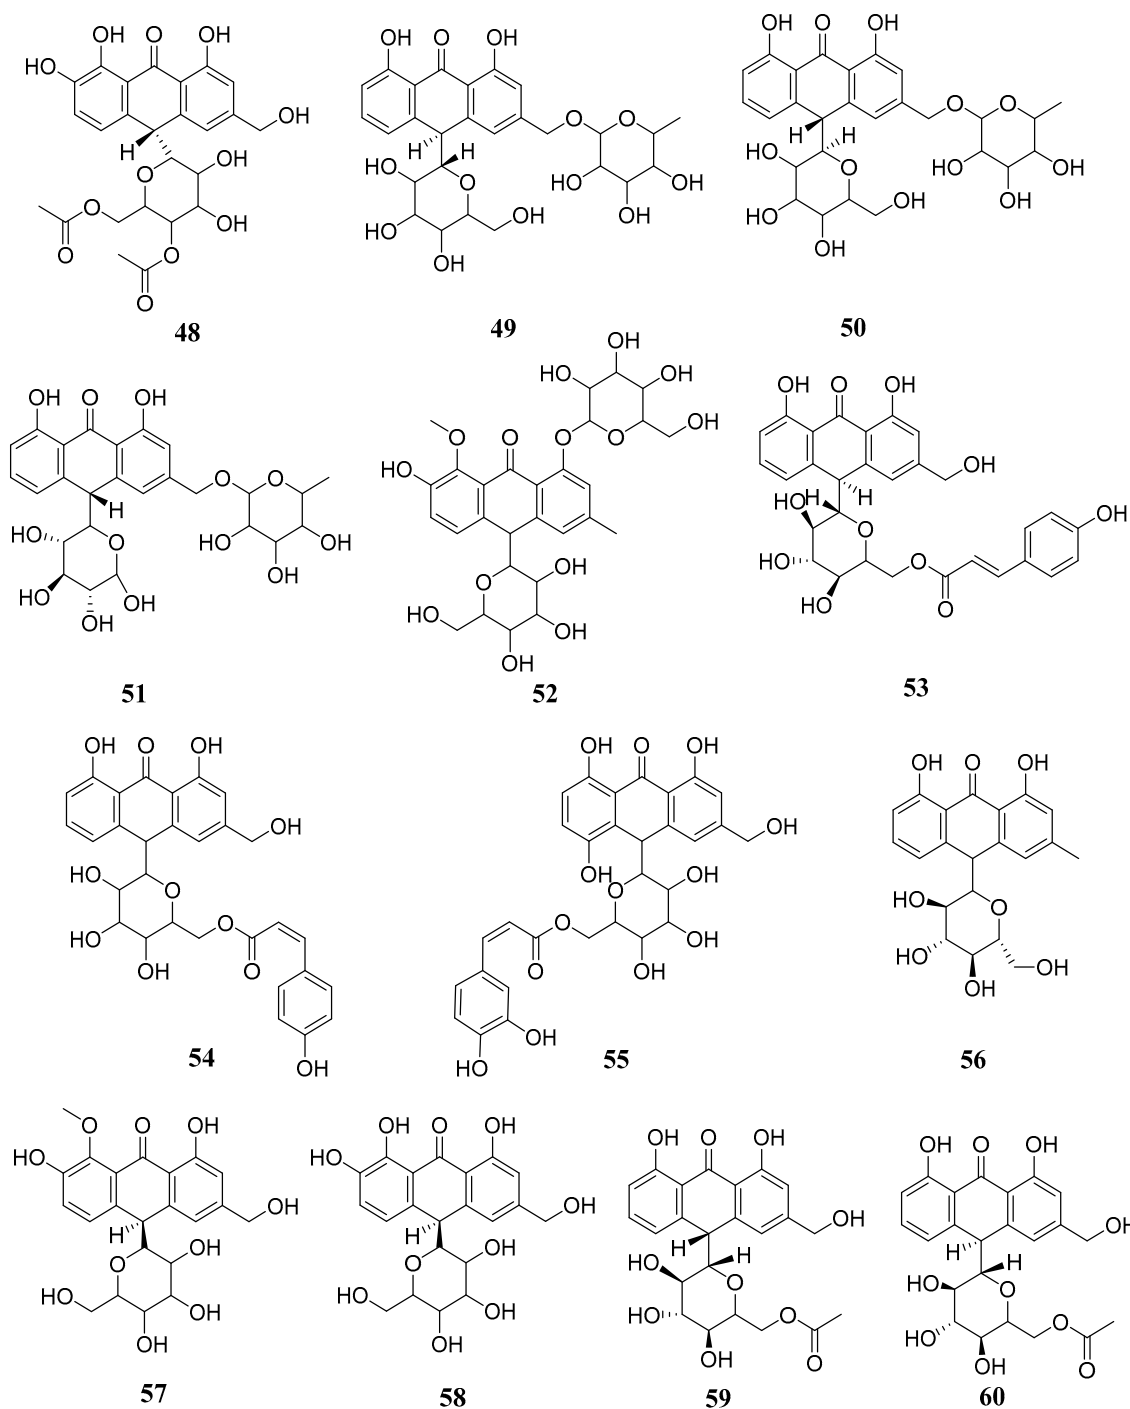

Figure S4: Com-

pounds isolated from genus Aloe (48-60)

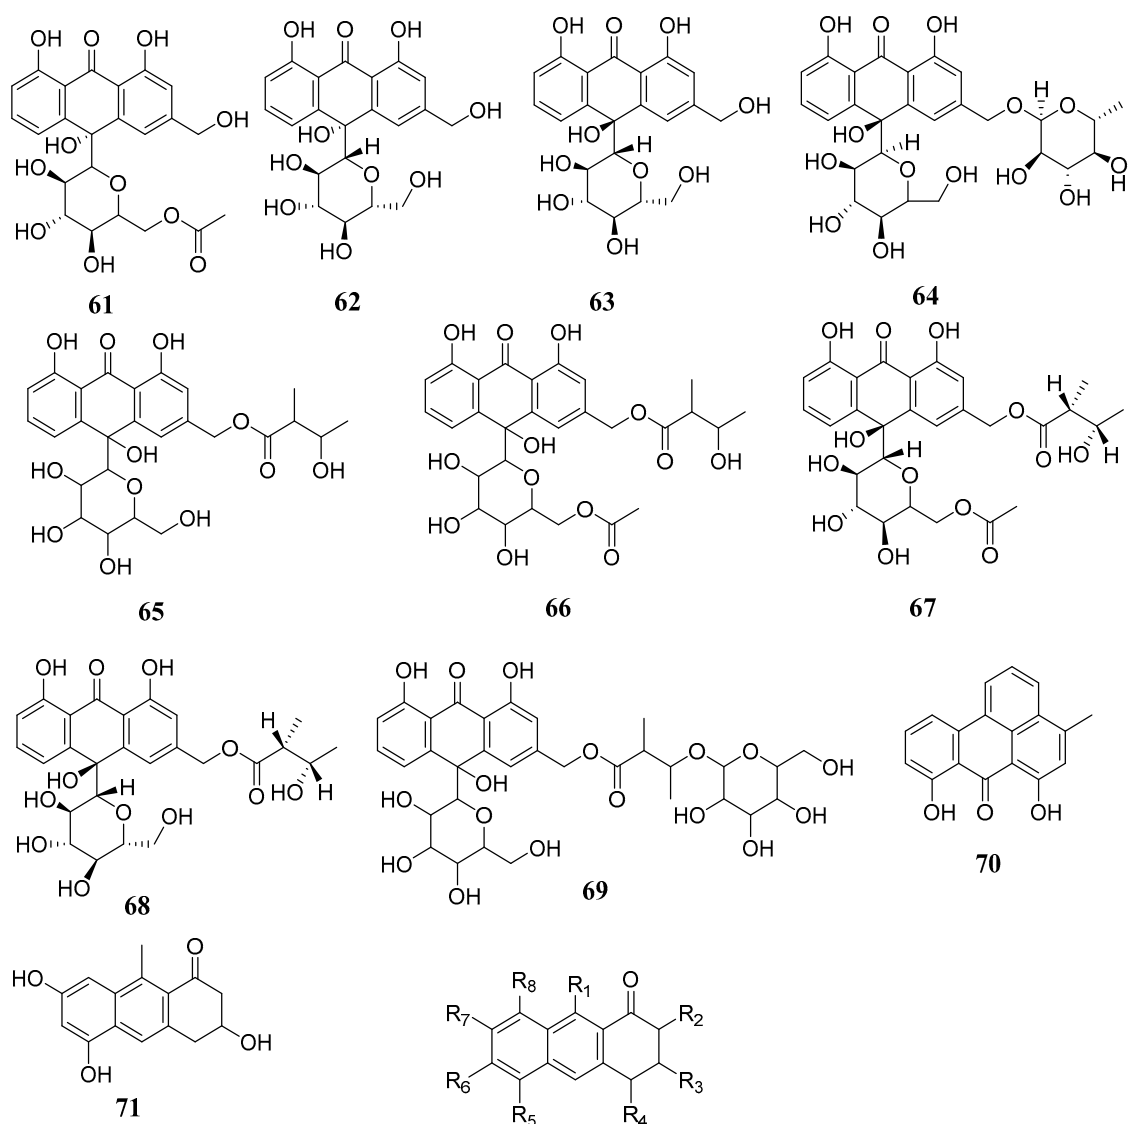

|    | R <sub>1</sub>  | R <sub>2</sub>   | R <sub>3</sub> | R <sub>4</sub> | R <sub>5</sub> | R <sub>6</sub>   | R <sub>7</sub> | R <sub>8</sub>  |
|----|-----------------|------------------|----------------|----------------|----------------|------------------|----------------|-----------------|
| 72 | CH <sub>3</sub> | H                | OH             | H              | OH             | H                | OH             | H               |
| 73 | OH              | H                | OH             | H              | H              | OH               | H              | CH <sub>3</sub> |
| 74 | OH              | H                | OH             | H              | H              | OCH <sub>3</sub> | H              | CH <sub>3</sub> |
| 75 | OH              | OCH <sub>3</sub> | H              | OH             | H              | CH <sub>3</sub>  | H              | OH              |

**Figure S5:** Compounds isolated from genus Aloe (61-75)

|                                                                                     |                           |                      |                      |                                       |                      |                      |                      |                      |
|-------------------------------------------------------------------------------------|---------------------------|----------------------|----------------------|---------------------------------------|----------------------|----------------------|----------------------|----------------------|
| 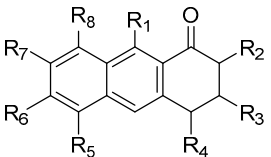   |                           |                      |                      |                                       |                      |                      |                      |                      |
|                                                                                     | <b>R<sub>1</sub></b>      | <b>R<sub>2</sub></b> | <b>R<sub>3</sub></b> | <b>R<sub>4</sub></b>                  | <b>R<sub>5</sub></b> | <b>R<sub>6</sub></b> | <b>R<sub>7</sub></b> | <b>R<sub>8</sub></b> |
| <b>76</b>                                                                           | OH                        | H                    | OH                   | H                                     | H                    | OH                   | COOCH <sub>3</sub>   | CH <sub>3</sub>      |
| <b>77</b>                                                                           | OH                        | H                    | H                    | OH                                    | H                    | CH <sub>3</sub>      | H                    | OH                   |
| <b>78</b>                                                                           | OH                        | H                    | H                    | OH                                    | H                    | CH <sub>3</sub>      | H                    | OCH <sub>3</sub>     |
| <b>79</b>                                                                           | OH                        | H                    | H                    | OH                                    | H                    | CH <sub>3</sub>      | H                    | <i>O</i> -β-D-Glc.   |
| <b>80</b>                                                                           | OH                        | OCH <sub>3</sub>     | H                    | OH                                    | H                    | CH <sub>3</sub>      | H                    | <i>O</i> -β-D-Glc.   |
| <b>81</b>                                                                           | OH                        | OH                   | H                    | <i>O</i> -β-D-Glc.                    | H                    | CH <sub>3</sub>      | H                    | OH                   |
| <b>82</b>                                                                           | OH                        | OCH <sub>3</sub>     | H                    | <i>O</i> -β-D-Glc.                    | H                    | CH <sub>3</sub>      | H                    | OH                   |
| <b>83</b>                                                                           | OH                        | H                    | OH                   | H                                     | H                    | <i>O</i> -β-D-Glc.   | H                    | CH <sub>3</sub>      |
| <b>84</b>                                                                           | OH                        | H                    | <i>O</i> -β-D-Glc.   | H                                     | H                    | OH                   | COOCH <sub>3</sub>   | CH <sub>3</sub>      |
|  |                           |                      |                      |                                       |                      |                      |                      |                      |
| <b>85</b>                                                                           | <b>R = H</b>              |                      |                      |                                       |                      |                      |                      |                      |
| <b>86</b>                                                                           | <b>R = CH<sub>3</sub></b> |                      |                      |                                       |                      |                      |                      |                      |
|                                                                                     | <b>R<sub>1</sub></b>      | <b>R<sub>2</sub></b> | <b>R<sub>3</sub></b> | <b>R<sub>4</sub></b>                  |                      |                      |                      |                      |
| <b>87</b>                                                                           | CH <sub>3</sub>           | OH                   | H                    | OH                                    |                      |                      |                      |                      |
| <b>88</b>                                                                           | CH <sub>3</sub>           | OH                   | H                    | CH <sub>3</sub>                       |                      |                      |                      |                      |
| <b>89</b>                                                                           | CH <sub>2</sub> (OH)      | OH                   | H                    | CH <sub>3</sub>                       |                      |                      |                      |                      |
| <b>90</b>                                                                           | CH <sub>2</sub> (OH)      | OCH <sub>3</sub>     | H                    | CH <sub>3</sub>                       |                      |                      |                      |                      |
| <b>91</b>                                                                           | CH <sub>3</sub>           | OH                   | H                    | CH <sub>2</sub> COCH <sub>3</sub>     |                      |                      |                      |                      |
| <b>92</b>                                                                           | CH <sub>3</sub>           | OH                   | H                    | CH <sub>2</sub> CH(OH)CH <sub>3</sub> |                      |                      |                      |                      |

**Figure S6:** Compounds isolated from genus *Aloe* (76-92)



|     | 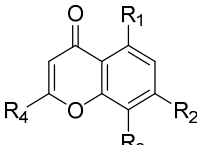 |                  |                                                                                      |                                                                                       |
|-----|-----------------------------------------------------------------------------------|------------------|--------------------------------------------------------------------------------------|---------------------------------------------------------------------------------------|
|     | R <sub>1</sub>                                                                    | R <sub>2</sub>   | R <sub>3</sub>                                                                       | R <sub>4</sub>                                                                        |
| 93  | OH                                                                                | OCH <sub>3</sub> | H                                                                                    | CH <sub>2</sub> (OH)                                                                  |
| 94  | OH                                                                                | OH               | H                                                                                    |    |
| 95  |  | H                | H                                                                                    | CH <sub>2</sub> (OH)                                                                  |
| 96  | CH <sub>3</sub>                                                                   | OH               | CH <sub>2</sub> COCH <sub>2</sub> (OH)                                               | CH <sub>2</sub> COCH <sub>3</sub>                                                     |
| 97  |  | H                | H                                                                                    | CH <sub>2</sub> (OH)                                                                  |
| 98  | CH <sub>3</sub>                                                                   | OCH <sub>3</sub> | $\beta$ -D-Glc.                                                                      |    |
| 99  | CH <sub>3</sub>                                                                   | OCH <sub>3</sub> | $\beta$ -D-Glc.                                                                      |   |
| 100 | CH <sub>3</sub>                                                                   | OH               | $\beta$ -D-Glc.                                                                      | CH <sub>2</sub> CH(OH)CH <sub>3</sub>                                                 |
| 101 | CH <sub>3</sub>                                                                   | OCH <sub>3</sub> | $\beta$ -D-Glc.                                                                      | CH <sub>2</sub> (OH)CH(OH)CH <sub>3</sub>                                             |
| 102 | CH <sub>3</sub>                                                                   | OCH <sub>3</sub> | $\beta$ -D-Glc.                                                                      |  |
| 103 | CH <sub>3</sub>                                                                   | OH               | $\beta$ -D-Glc.                                                                      | CH <sub>3</sub>                                                                       |
| 104 | OH                                                                                | OH               | $\beta$ -D-Glc.                                                                      | CH <sub>3</sub>                                                                       |
| 105 | OH                                                                                | OH               | $\alpha$ -D-Glc.                                                                     | CH <sub>3</sub>                                                                       |
| 106 | CH <sub>3</sub>                                                                   | OH               |  | CH <sub>2</sub> COCH <sub>3</sub>                                                     |
| 107 | CH <sub>3</sub>                                                                   | OH               | $\beta$ -D-Glc.                                                                      | CH <sub>2</sub> COCH <sub>3</sub>                                                     |

**Figure S7:** Compounds isolated from genus Aloe (93-107)

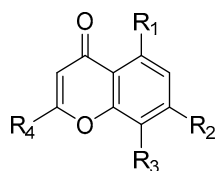

|            | <b>R<sub>1</sub></b> | <b>R<sub>2</sub></b> | <b>R<sub>3</sub></b> | <b>R<sub>5</sub></b>                  |
|------------|----------------------|----------------------|----------------------|---------------------------------------|
| <b>108</b> | CH <sub>3</sub>      | OCH <sub>3</sub>     | $\beta$ -D-Glc.      | CH <sub>2</sub> COCH <sub>3</sub>     |
| <b>109</b> | CH <sub>3</sub>      | OH                   |                      | CH <sub>2</sub> COCH <sub>3</sub>     |
| <b>110</b> | CH <sub>3</sub>      | OH                   | $\beta$ -D-Glc.      |                                       |
| <b>111</b> | CH <sub>3</sub>      | OH                   | $\beta$ -D-Glc.      |                                       |
| <b>112</b> | CH <sub>3</sub>      | OCH <sub>3</sub>     | $\beta$ -D-Glc.      |                                       |
| <b>113</b> | CH <sub>3</sub>      | OCH <sub>3</sub>     | $\beta$ -D-Glc.      |                                       |
| <b>114</b> | CH <sub>3</sub>      | OH                   |                      | CH <sub>2</sub> CH(OH)CH <sub>3</sub> |
| <b>115</b> | CH <sub>3</sub>      | OH                   |                      | CH <sub>2</sub> CH(OH)CH <sub>3</sub> |
| <b>116</b> | CH <sub>3</sub>      | OCH <sub>3</sub>     |                      | CH(OH)CH(OH)CH <sub>3</sub>           |
| <b>117</b> | CH <sub>3</sub>      | OCH <sub>3</sub>     |                      | CH <sub>2</sub> CH(OH)CH <sub>3</sub> |
| <b>118</b> | CH <sub>3</sub>      | OCH <sub>3</sub>     |                      |                                       |

**Figure S8:** Compounds isolated from genus Aloe (108-118)

|            | 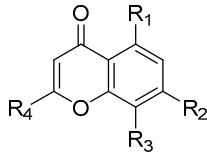 |                      |                                                                                      |                                                                                       |
|------------|-----------------------------------------------------------------------------------|----------------------|--------------------------------------------------------------------------------------|---------------------------------------------------------------------------------------|
|            | <b>R<sub>1</sub></b>                                                              | <b>R<sub>2</sub></b> | <b>R<sub>3</sub></b>                                                                 | <b>R<sub>4</sub></b>                                                                  |
| <b>119</b> | CH <sub>3</sub>                                                                   | OCH <sub>3</sub>     |    |    |
| <b>120</b> | CH <sub>3</sub>                                                                   | OCH <sub>3</sub>     |    |    |
| <b>121</b> | CH <sub>3</sub>                                                                   | OCH <sub>3</sub>     |    |    |
| <b>122</b> | CH <sub>3</sub>                                                                   | OCH <sub>3</sub>     |   |    |
| <b>123</b> | CH <sub>3</sub>                                                                   | OCH <sub>3</sub>     |  |  |
| <b>124</b> | CH <sub>3</sub>                                                                   | OCH <sub>3</sub>     |  |  |
| <b>125</b> | CH <sub>3</sub>                                                                   | OH                   |  | CH <sub>2</sub> COCH <sub>3</sub>                                                     |
| <b>126</b> | CH <sub>3</sub>                                                                   | OCH <sub>3</sub>     |  | CH <sub>2</sub> COCH <sub>3</sub>                                                     |
| <b>127</b> | CH <sub>3</sub>                                                                   | OCH <sub>3</sub>     |  | CH <sub>2</sub> COCH <sub>3</sub>                                                     |

**Figure S9:** Compounds isolated from genus Aloe (119-127)

|            | 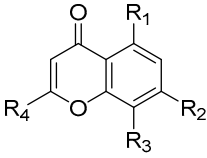 |                      |                                                                                      |                                   |
|------------|-----------------------------------------------------------------------------------|----------------------|--------------------------------------------------------------------------------------|-----------------------------------|
|            | <b>R<sub>1</sub></b>                                                              | <b>R<sub>2</sub></b> | <b>R<sub>3</sub></b>                                                                 | <b>R<sub>4</sub></b>              |
| <b>128</b> | CH <sub>3</sub>                                                                   | OH                   |    | CH <sub>2</sub> COCH <sub>3</sub> |
| <b>129</b> | CH <sub>3</sub>                                                                   | OH                   |    | CH <sub>2</sub> COCH <sub>3</sub> |
| <b>130</b> | CH <sub>3</sub>                                                                   | OH                   |    | CH <sub>2</sub> COCH <sub>3</sub> |
| <b>131</b> | CH <sub>3</sub>                                                                   | OCH <sub>3</sub>     |    | CH <sub>2</sub> COCH <sub>3</sub> |
| <b>132</b> | CH <sub>3</sub>                                                                   | OCH <sub>3</sub>     |  | CH <sub>2</sub> COCH <sub>3</sub> |
| <b>133</b> | CH <sub>3</sub>                                                                   | OH                   |  | CH <sub>2</sub> COCH <sub>3</sub> |
| <b>134</b> | CH <sub>3</sub>                                                                   | OCH <sub>3</sub>     |  | CH <sub>2</sub> COCH <sub>3</sub> |
| <b>135</b> | CH <sub>3</sub>                                                                   | OH                   |  | CH <sub>2</sub> COCH <sub>3</sub> |
| <b>136</b> | CH <sub>3</sub>                                                                   | OH                   |  | CH <sub>2</sub> COCH <sub>3</sub> |

**Figure S10:** Compounds isolated from genus Aloe (128-136)

|            | 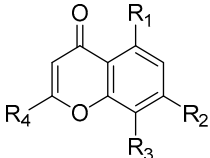   |                      |                                                                                      |                                                                                       |
|------------|-------------------------------------------------------------------------------------|----------------------|--------------------------------------------------------------------------------------|---------------------------------------------------------------------------------------|
|            | <b>R<sub>1</sub></b>                                                                | <b>R<sub>2</sub></b> | <b>R<sub>3</sub></b>                                                                 | <b>R<sub>4</sub></b>                                                                  |
| <b>137</b> | CH <sub>3</sub>                                                                     | <i>O</i> -β-D-Glc.   |    | CH <sub>2</sub> COCH <sub>3</sub>                                                     |
| <b>138</b> | CH <sub>3</sub>                                                                     | <i>O</i> -β-D-Glc.   |    | CH <sub>2</sub> COCH <sub>3</sub>                                                     |
| <b>139</b> | CH <sub>3</sub>                                                                     | OCH <sub>3</sub>     |    | CH <sub>2</sub> CH(OH)CH <sub>3</sub>                                                 |
| <b>140</b> | CH <sub>3</sub>                                                                     | OCH <sub>3</sub>     |   | CH <sub>2</sub> CH(OH)CH <sub>3</sub>                                                 |
| <b>141</b> | CH <sub>3</sub>                                                                     | OH                   |  | COOH                                                                                  |
| <b>142</b> | CH <sub>3</sub>                                                                     | OCH <sub>3</sub>     |  |  |
| <b>143</b> |  | H                    | H                                                                                    | CH <sub>2</sub> <i>O</i> -β-D-Glc.                                                    |
| <b>144</b> | CH <sub>3</sub>                                                                     | OCH <sub>3</sub>     |  |  |

**Figure S11:** Compounds isolated from genus *Aloe* (137-144)

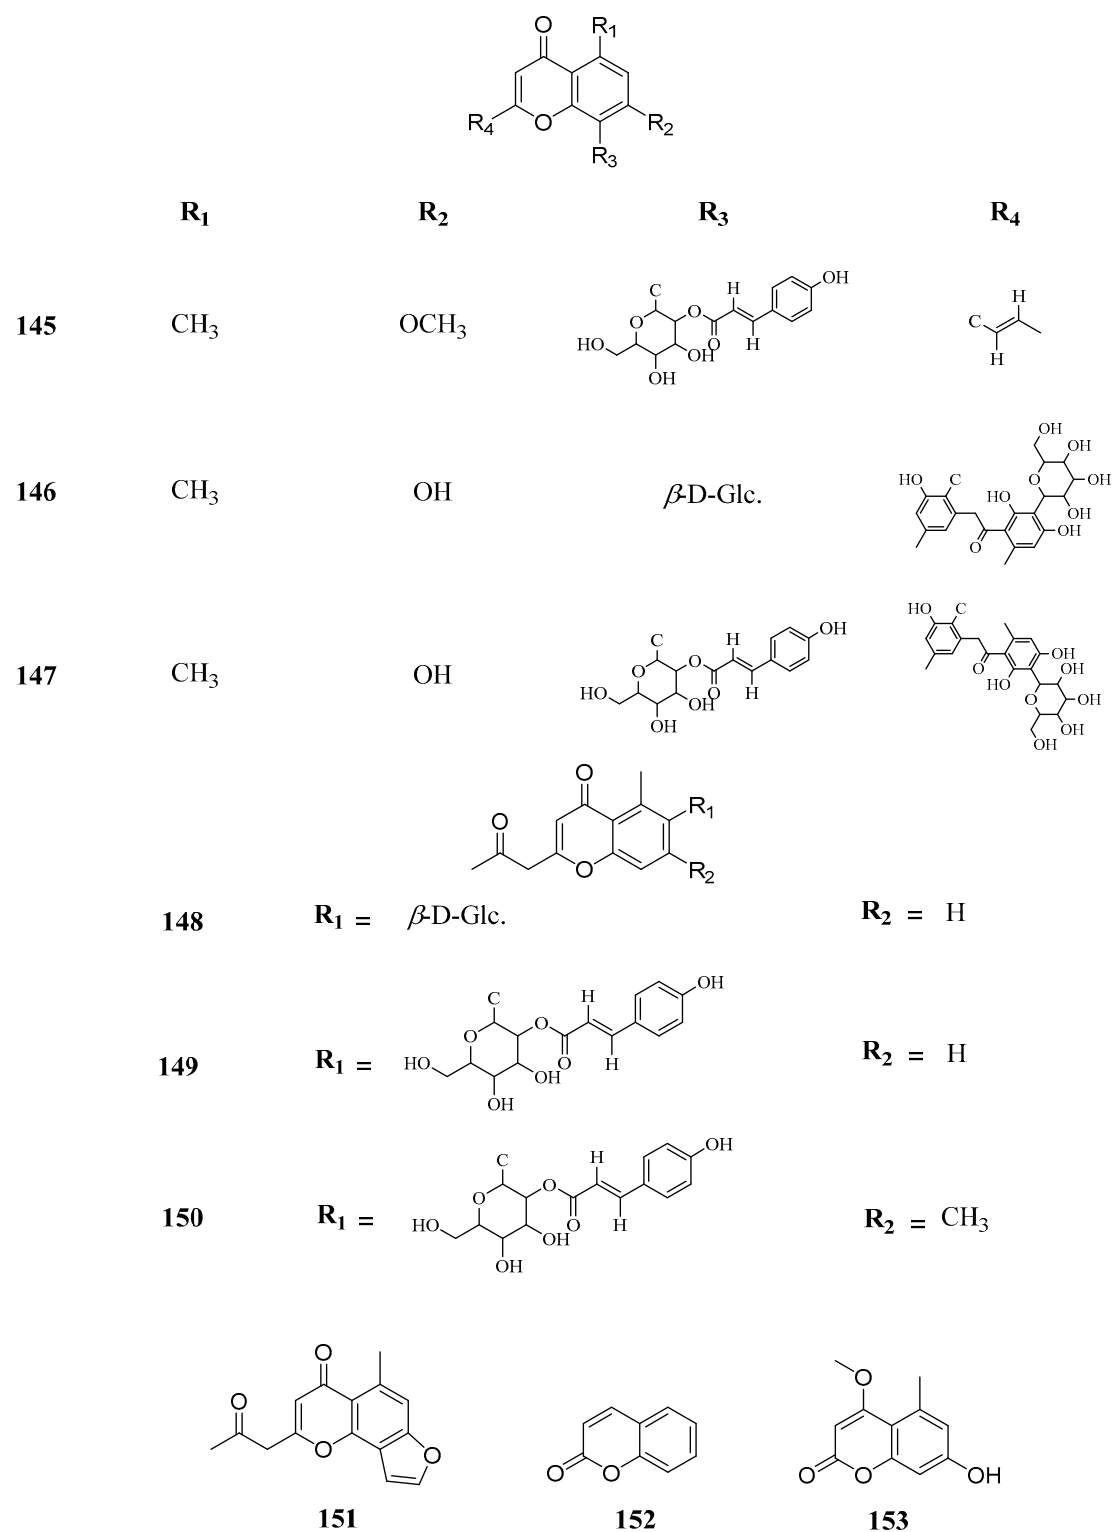

**Figure S12:** Compounds isolated from genus Aloe (145-153)

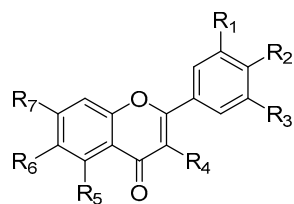

|            | <b>R<sub>1</sub></b> | <b>R<sub>2</sub></b> | <b>R<sub>3</sub></b> | <b>R<sub>4</sub></b>                                      | <b>R<sub>5</sub></b> | <b>R<sub>6</sub></b> | <b>R<sub>7</sub></b> |
|------------|----------------------|----------------------|----------------------|-----------------------------------------------------------|----------------------|----------------------|----------------------|
| <b>154</b> | H                    | OH                   | H                    | H                                                         | OH                   | H                    | OH                   |
| <b>155</b> | H                    | OH                   | H                    | OH                                                        | OH                   | H                    | OH                   |
| <b>156</b> | H                    | OH                   | OH                   | OH                                                        | OH                   | H                    | OH                   |
| <b>157</b> | OH                   | OH                   | OH                   | OH                                                        | OH                   | H                    | OH                   |
| <b>158</b> | OH                   | OH                   | H                    | <i>O</i> - $\alpha$ -L-Rha.                               | OH                   | H                    | OH                   |
| <b>159</b> | OH                   | OH                   | H                    | <i>O</i> - $\beta$ -D-Glc.-6- <i>O</i> - $\alpha$ -L-Rha. | OH                   | H                    | OH                   |
| <b>160</b> | OCH <sub>3</sub>     | OH                   | OCH <sub>3</sub>     | <i>O</i> - $\beta$ -D-Glc.-6- <i>O</i> - $\alpha$ -L-Rha. | OH                   | OCH <sub>3</sub>     | OCH <sub>3</sub>     |

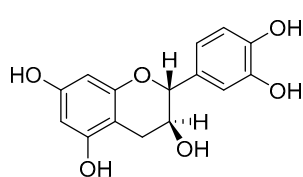

**161**

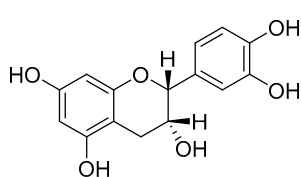

**162**

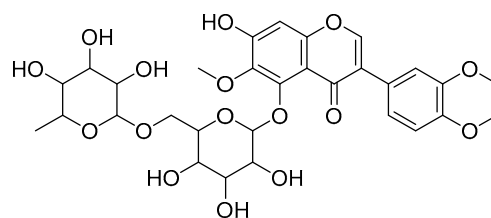

**163**

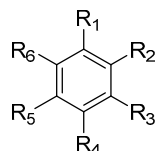

|            | <b>R<sub>1</sub></b> | <b>R<sub>2</sub></b> | <b>R<sub>3</sub></b> | <b>R<sub>4</sub></b> | <b>R<sub>5</sub></b> | <b>R<sub>6</sub></b> |
|------------|----------------------|----------------------|----------------------|----------------------|----------------------|----------------------|
| <b>164</b> | OH                   | OH                   | H                    | H                    | H                    | H                    |
| <b>165</b> | OH                   | CHO                  | H                    | H                    | H                    | H                    |
| <b>166</b> | CH <sub>3</sub>      | H                    | H                    | OH                   | H                    | H                    |
| <b>167</b> | COCH <sub>3</sub>    | H                    | H                    | OH                   | H                    | H                    |
| <b>168</b> | CHO                  | H                    | H                    | OH                   | H                    | H                    |

**Figure S13:** Compounds isolated from genus Aloe (**154-168**)

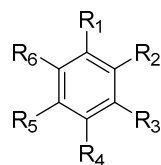

|            | <b>R<sub>1</sub></b>                                   | <b>R<sub>2</sub></b> | <b>R<sub>3</sub></b> | <b>R<sub>4</sub></b> | <b>R<sub>5</sub></b> | <b>R<sub>6</sub></b> |
|------------|--------------------------------------------------------|----------------------|----------------------|----------------------|----------------------|----------------------|
| <b>169</b> | CHO                                                    | H                    | H                    | OCH <sub>3</sub>     | H                    | H                    |
| <b>170</b> | CH <sub>2</sub> CH <sub>2</sub> CO<br>OH               | H                    | H                    | OH                   | H                    | H                    |
| <b>171</b> | CH <sub>2</sub> CH <sub>2</sub> CO<br>OCH <sub>3</sub> | H                    | H                    | OH                   | H                    | H                    |
| <b>172</b> |                                                        | H                    | H                    | OH                   | H                    | H                    |
| <b>173</b> |                                                        | H                    | H                    | OH                   | OH                   | H                    |
| <b>174</b> |                                                        | H                    | H                    | OH                   | OCH <sub>3</sub>     | H                    |
| <b>175</b> |                                                        | H                    | OCH <sub>3</sub>     | OH                   | OCH <sub>3</sub>     | H                    |
| <b>176</b> | OH                                                     | H                    | CH <sub>3</sub>      | H                    | OH                   | H                    |
| <b>177</b> | COOH                                                   | OH                   | H                    | H                    | OH                   | H                    |
| <b>178</b> | COOH                                                   | H                    | H                    | OH                   | OH                   | H                    |
| <b>179</b> | COOH                                                   | H                    | H                    | OH                   | OCH <sub>3</sub>     | H                    |
| <b>180</b> | COOH                                                   | H                    | OH                   | OH                   | OH                   | H                    |
| <b>181</b> | COOH                                                   | H                    | OCH <sub>3</sub>     | OH                   | OCH <sub>3</sub>     | H                    |
| <b>182</b> | COCH <sub>3</sub>                                      | CH <sub>3</sub>      | H                    | OH                   | H                    | OH                   |

**Figure S14:** Compounds isolated from genus Aloe (**169-182**)



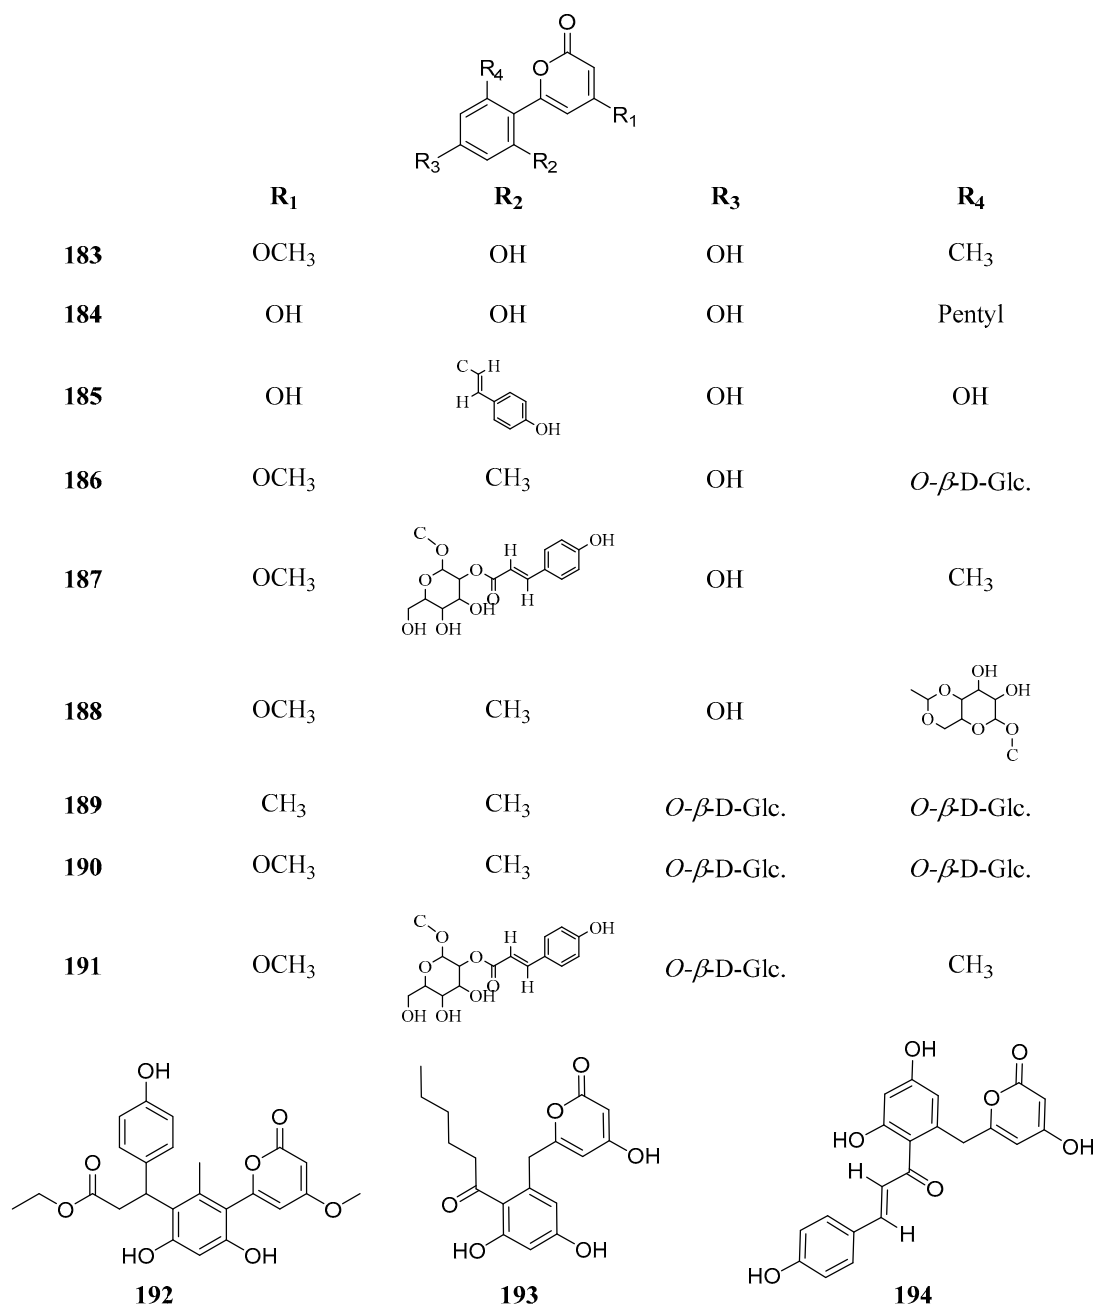

**Figure S15:** Compounds isolated from genus Aloe (183-194)

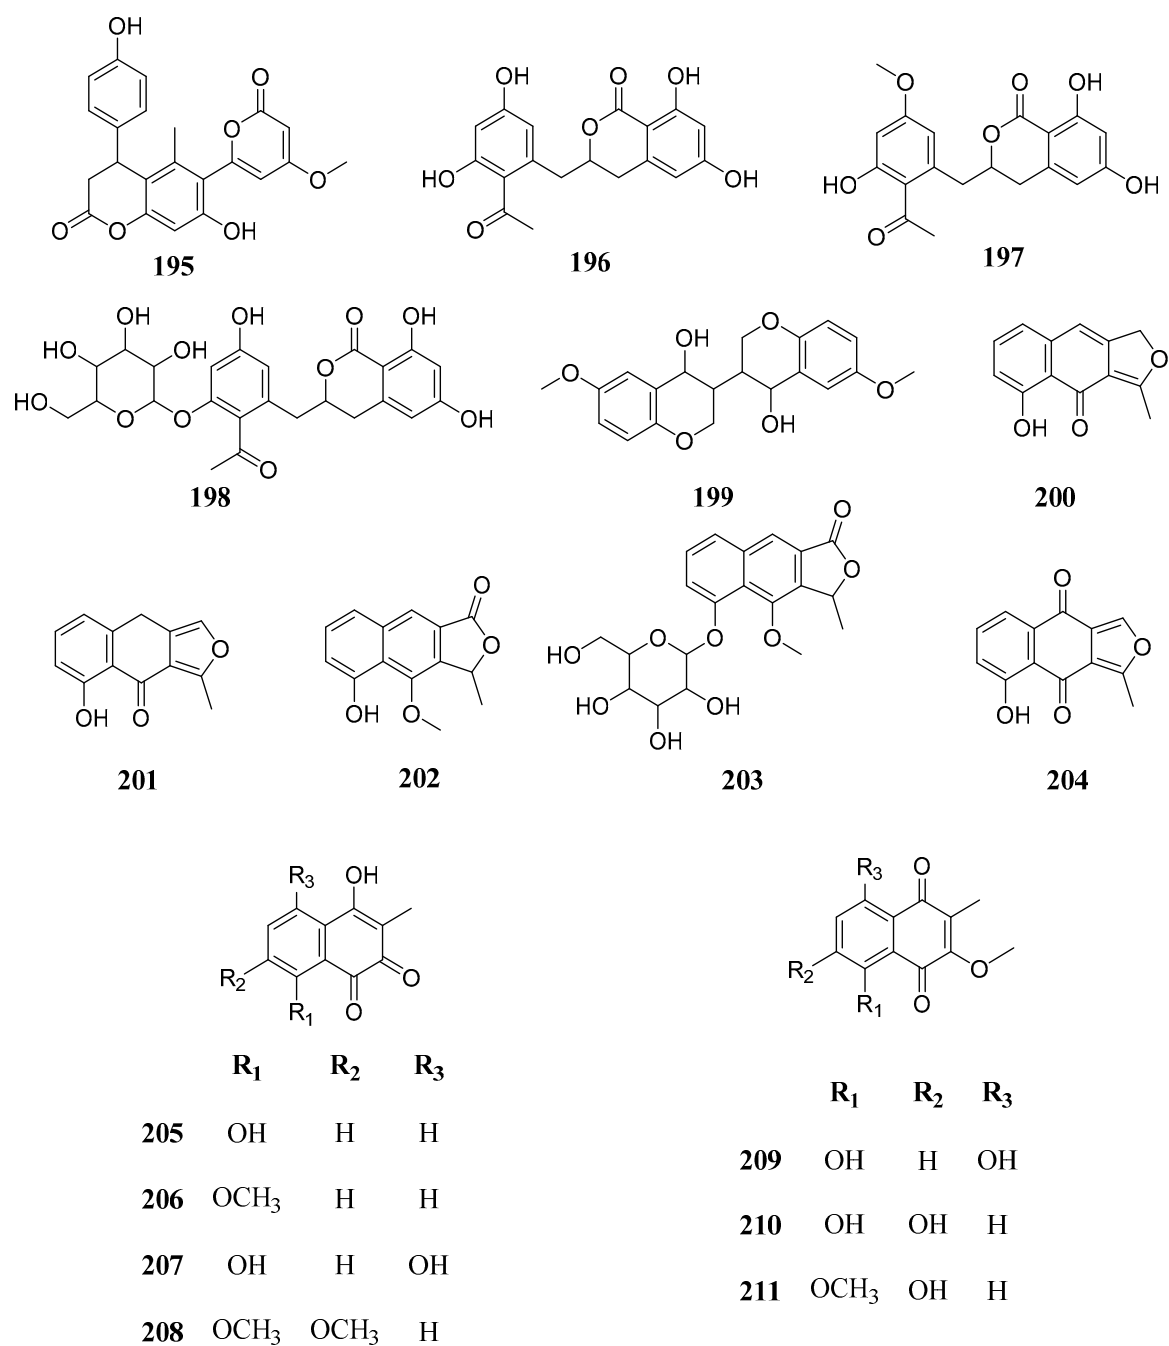

**Figure S16:** Compounds isolated from genus Aloe (195-211)

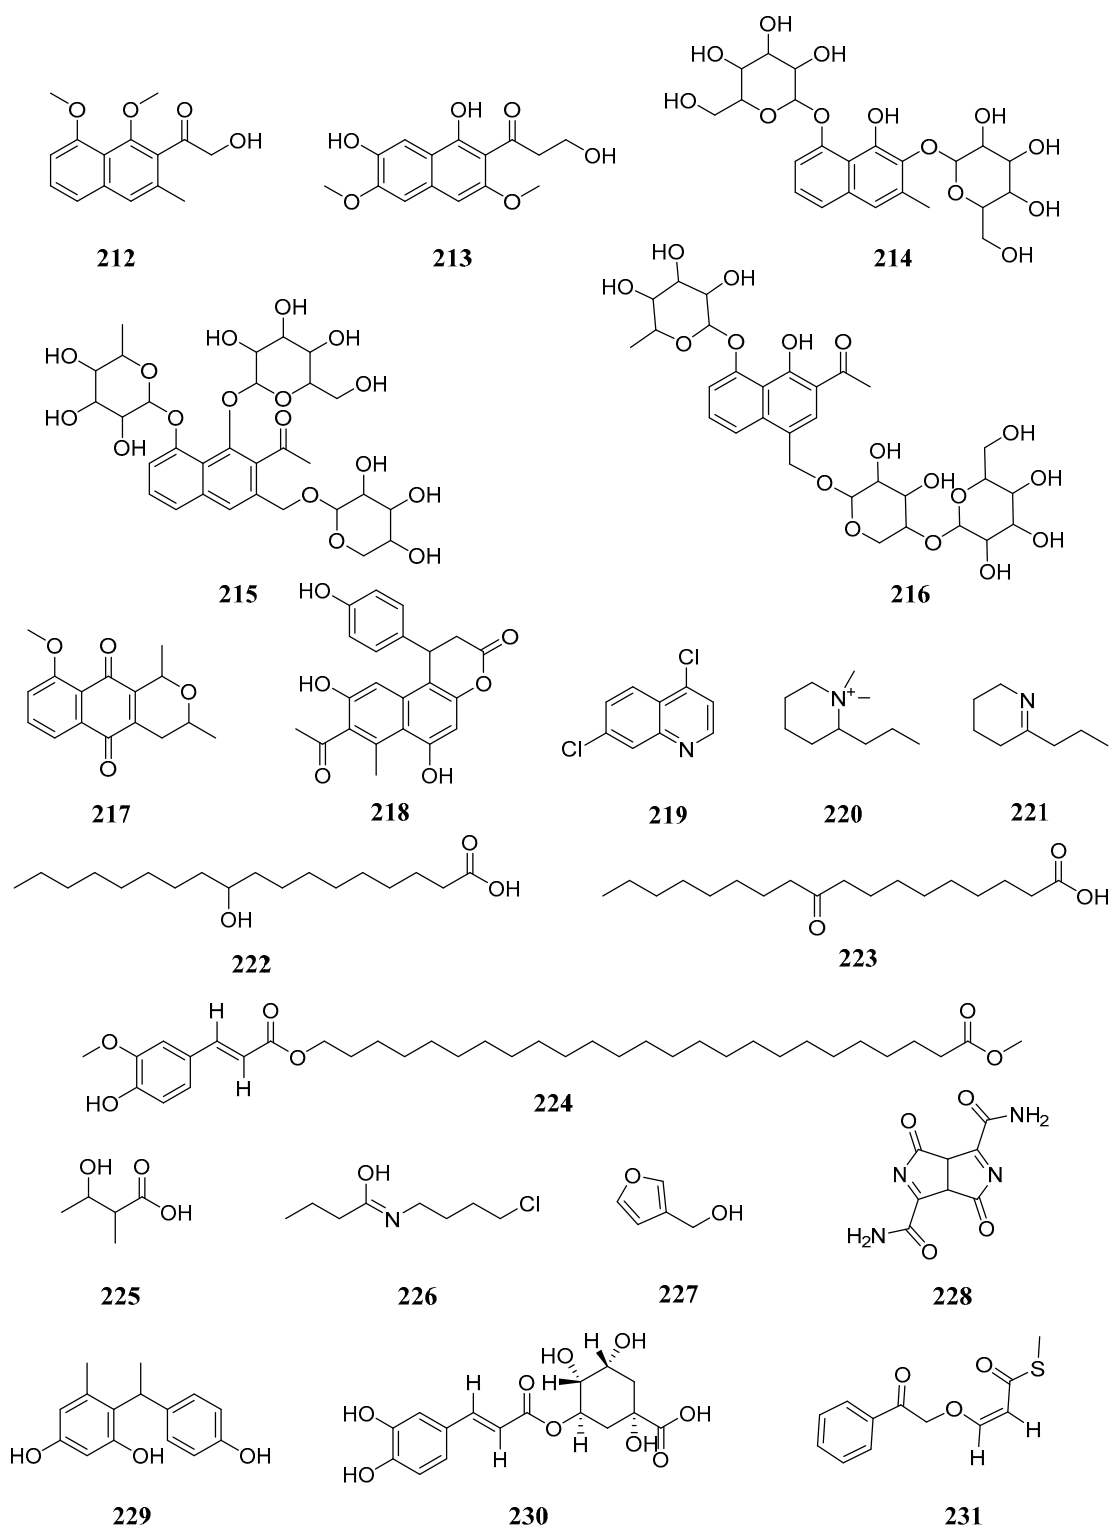

**Figure S17:** Compounds isolated from genus *Aloe* (212-231)

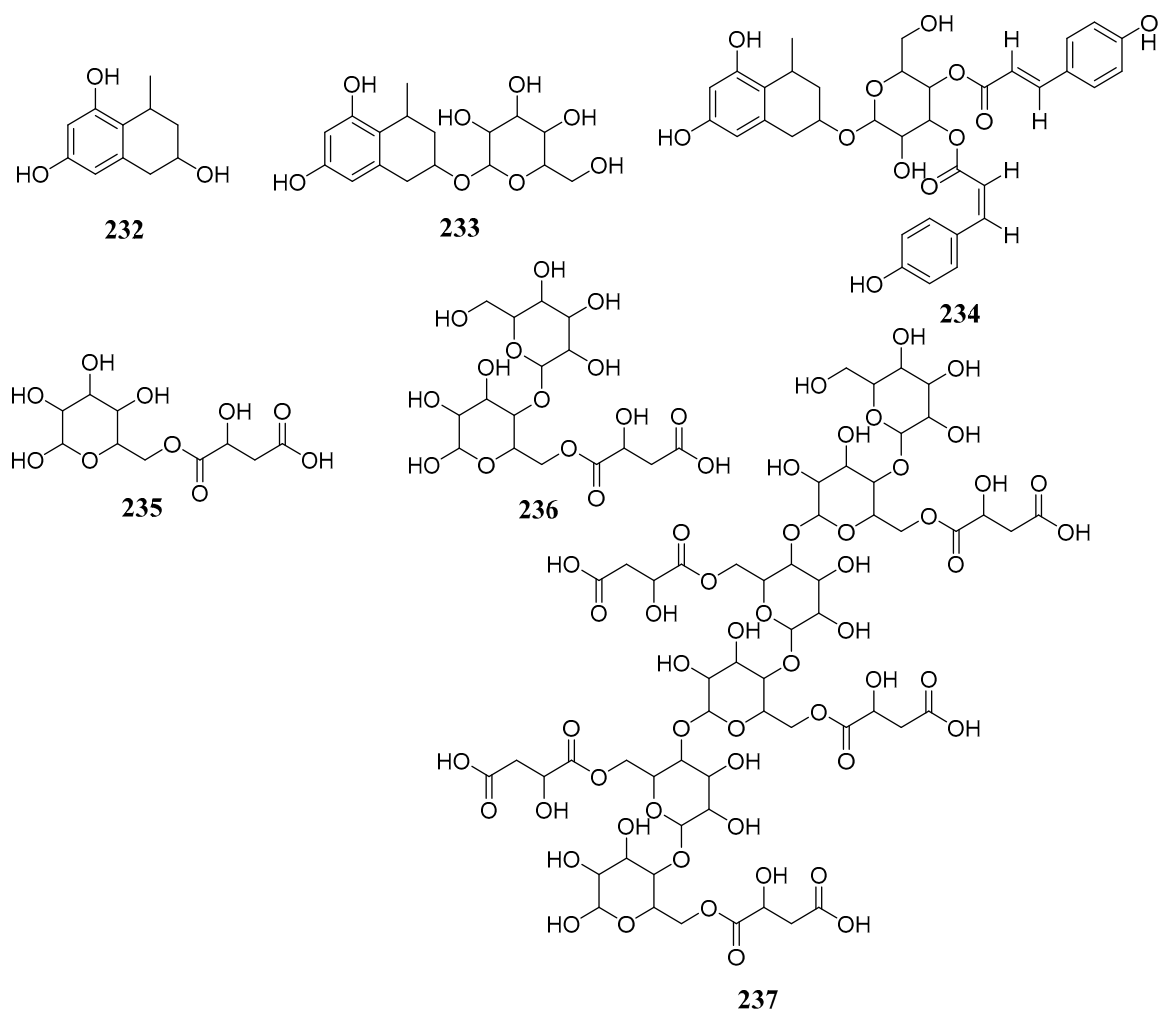

**Figure S18:** Compounds isolated from genus Aloe (232-237)

**Table 1.** Predicted pharmacokinetics of top scoring compounds.

| Compound No.               | 115       | 120       | 131       | 132       | 134       | 159       |
|----------------------------|-----------|-----------|-----------|-----------|-----------|-----------|
| BBB                        | 0.044     | 0.041     | 0.0215873 | 0.03      | 0.02      | 0.02      |
| Buffer_solubility_mg_L     | 12.77     | 18.077    | 4.84474   | 10.88     | 4.19      | 28.88     |
| Caco2                      | 12.86     | 10.71     | 11.4372   | 10.62     | 9.20      | 7.91      |
| CYP_2C19_inhibition        | Inhibitor | Inhibitor | Inhibitor | Inhibitor | Inhibitor | Inhibitor |
| CYP_2C9_inhibition         | Inhibitor | Inhibitor | Inhibitor | Inhibitor | Inhibitor | Inhibitor |
| CYP_2D6_inhibition         | Non       | Non       | Non       | Non       | Non       | Non       |
| CYP_2D6_substrate          | Non       | Non       | Non       | Non       | Non       | Non       |
| CYP_3A4_inhibition         | Inhibitor | Inhibitor | Inhibitor | Inhibitor | Inhibitor | Inhibitor |
| CYP_3A4_substrate          | Substrate | Weakly    | Weakly    | Weakly    | Weakly    | Weakly    |
| HIA                        | 77.11     | 57.61     | 82.803611 | 66.18     | 79.98     | 2.86      |
| MDCK                       | 0.051     | 0.05      | 0.0511802 | 0.053     | 0.05      | 0.32      |
| Pgp_inhibition             | Inhibitor | Non       | Non       | Non       | Non       | Non       |
| Plasma_Protein_Binding     | 77.20     | 73.52     | 74.833673 | 68.96     | 68.79     | 43.89     |
| Pure_water_solubility_mg_L | 3.29      | 4.86      | 3.74378   | 4.05      | 1.88      | 217.20    |
| Skin_Permability           | -3.73     | -3.85     | -3.65856  | -3.80     | -3.65     | -4.66     |
| SKlogD_value               | 1.72      | 1.58      | 1.44      | 1.49      | 1.63      | -1.11     |
| SKlogP_value               | 1.72      | 1.58      | 1.44      | 1.49      | 1.63      | -1.11     |
| SKlogS_buffer              | -4.63     | -4.50     | -5.058    | -4.72     | -5.14     | -4.32     |
| SKlogS_pure                | -5.22     | -5.07     | -5.17     | -5.14     | -5.49     | -3.44     |
